# Supplementary material for: Sac7 and Rho1 regulate the white-to-opaque switching in Candida albicans
Source: PubMed Central journal article supplement (PMC5772354; doi:10.1038/s41598-018-19246-9), 2018-01-17
Supplement: 41598_2018_19246_MOESM1_ESM.pdf [file 41598_2018_19246_MOESM1_ESM.pdf]

## Supplementary Information

### **Sac7 and Rho1 regulate the white-to-opaque switching in *Candida albicans***

Siwy Ling Yang<sup>1¶</sup>, Guisheng Zeng<sup>1¶</sup>, Fong Yee Chan<sup>1</sup>, Yan-Ming Wang<sup>1</sup>, Dongliang Yang<sup>2</sup>, and Yue Wang<sup>1, 3\*</sup>

<sup>1</sup>Institute of Molecular and Cell Biology, 61 Biopolis Drive, Proteos, Singapore 138673;

<sup>2</sup>Institute of Advanced Materials, Nanjing University of Posts and Telecommunications, Nanjing, Jiangsu 210046, People's Republic of China; <sup>3</sup>Department of Biochemistry, Yong Loo Lin School of Medicine, National University of Singapore, Singapore 117597

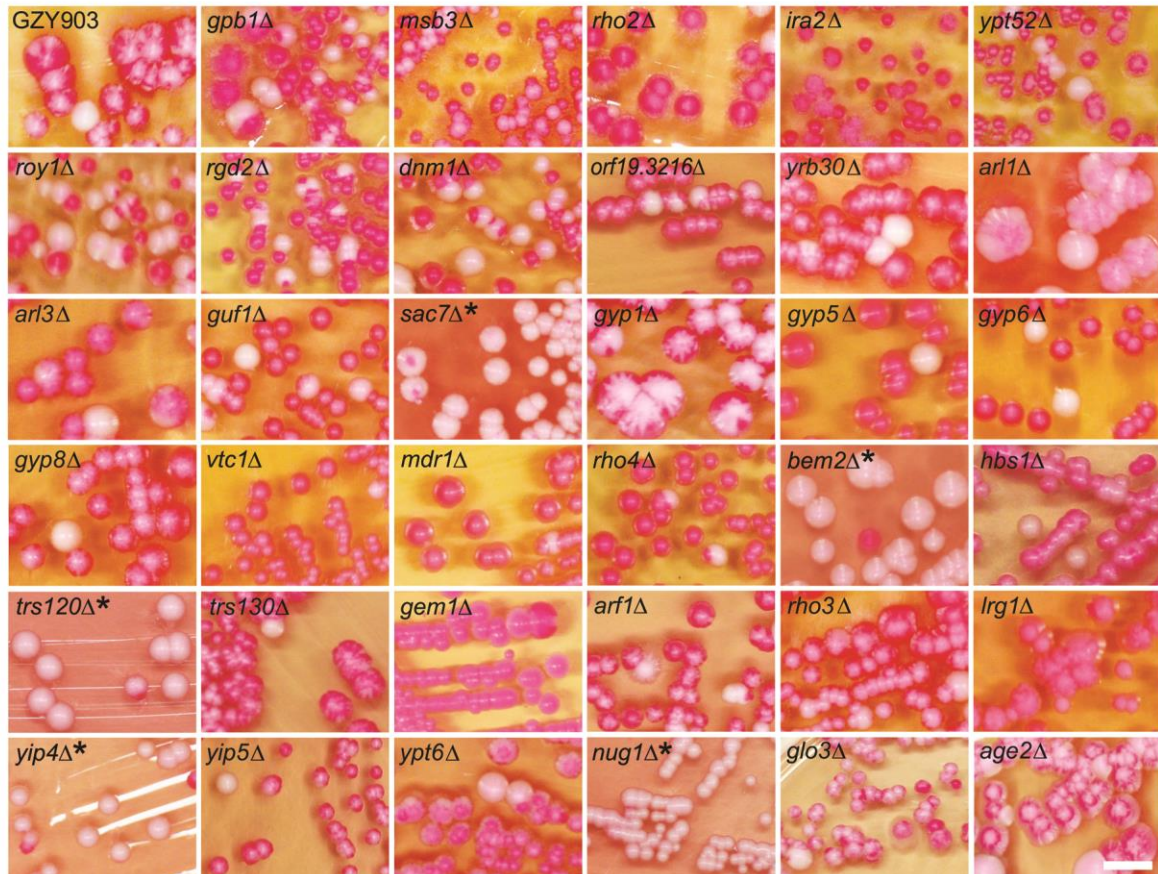

**Fig. S1:** Wild-type (GZY903) and haploid deletion mutants (as indicated) were streaked onto YPD (pH 6.0, +PB) plates and incubated at 30°C for 7 days to allow the formation of single colonies. Representative images of colonies from each strain are shown. Asterisks indicate mutants with much less red colonies than the wild type. Bar, 5 mm.

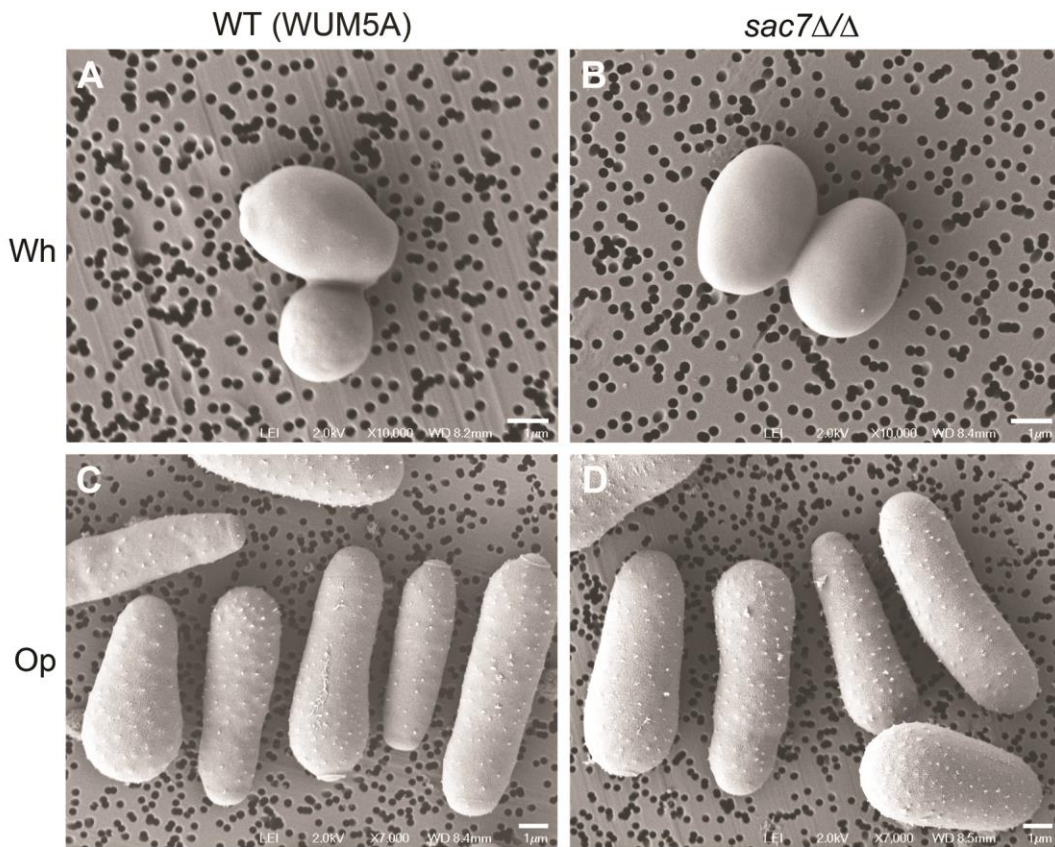

**Fig. S2:** Scanning electron micrographs of white (A and B) and opaque (C and D) cells. WT (WUM5A, A and C) and *sac7Δ/Δ* (YSL504, B and D) cells were grown on Lee's GlcNAc plates (pH 6.0, +PB) in the dark at 25°C for 6 days. Cells from white and red colonies of each strain were then grown in liquid Lee's medium with 1.25% glucose (white) or with 1.25% GlcNAc (Red) at 25°C for 3 days. To perform SEM, cells were harvested and washed once with 0.1M sodium cacodylate buffer (pH 7.4). Cells were then resuspended in fixation buffer (2.5% glutaraldehyde in 0.1M sodium cacodylate buffer, pH 7.4) and incubated on shaker for 30 min at 25°C. Post-staining was done in 1% osmium tetroxide before gradual dehydration in increasing ethanol concentrations. Dehydrated cells were dried in a critical point dryer before being mounted and sputter coated with gold (Leica). Samples were viewed in a Jeol 6701F field emission SEM.



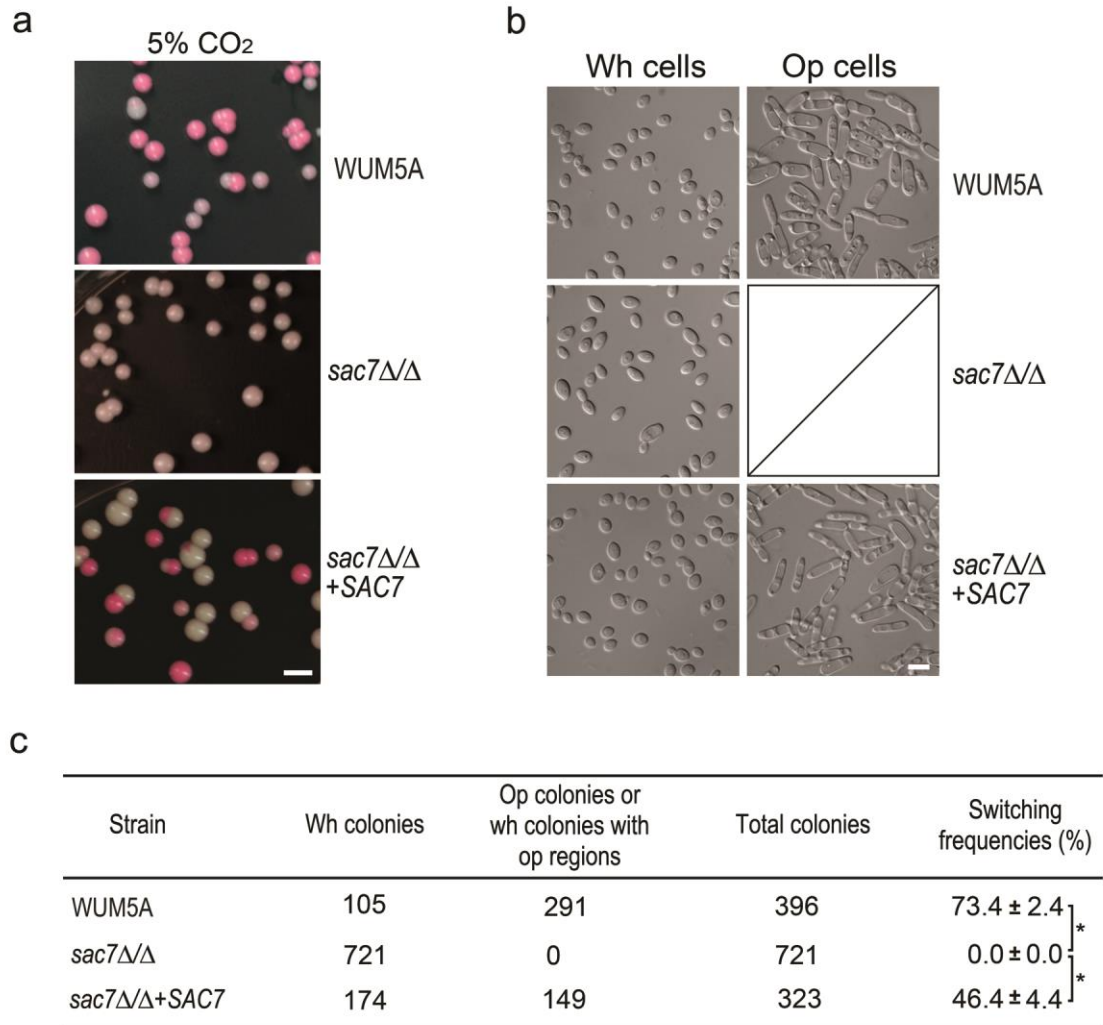

**Fig. S3:** The *sac7Δ/Δ* mutant is defective in CO<sub>2</sub>-induced white-to-opaque switching. (a) Cells of WUM5A (WT), *sac7Δ/Δ* (YSL504), and *sac7Δ/Δ*+SAC7 (YSL532) were spread onto Lee's glucose plates (pH 6.0, +PB) and incubated in the presence of 5% CO<sub>2</sub> at 25°C in the dark for 4 days before photography. (b) Cells from randomly selected red and white colonies of the tested strains were suspended in water and examined under a microscope. (c) The white-to-opaque switching frequency for GH1322, *sac7Δ/Δ*, and *sac7Δ/Δ*+SAC7 tested on Lee's glucose plates (pH 6.0, +PB) in the presence of 5% CO<sub>2</sub>. \*, p<0.05 (Student's *t*-test).

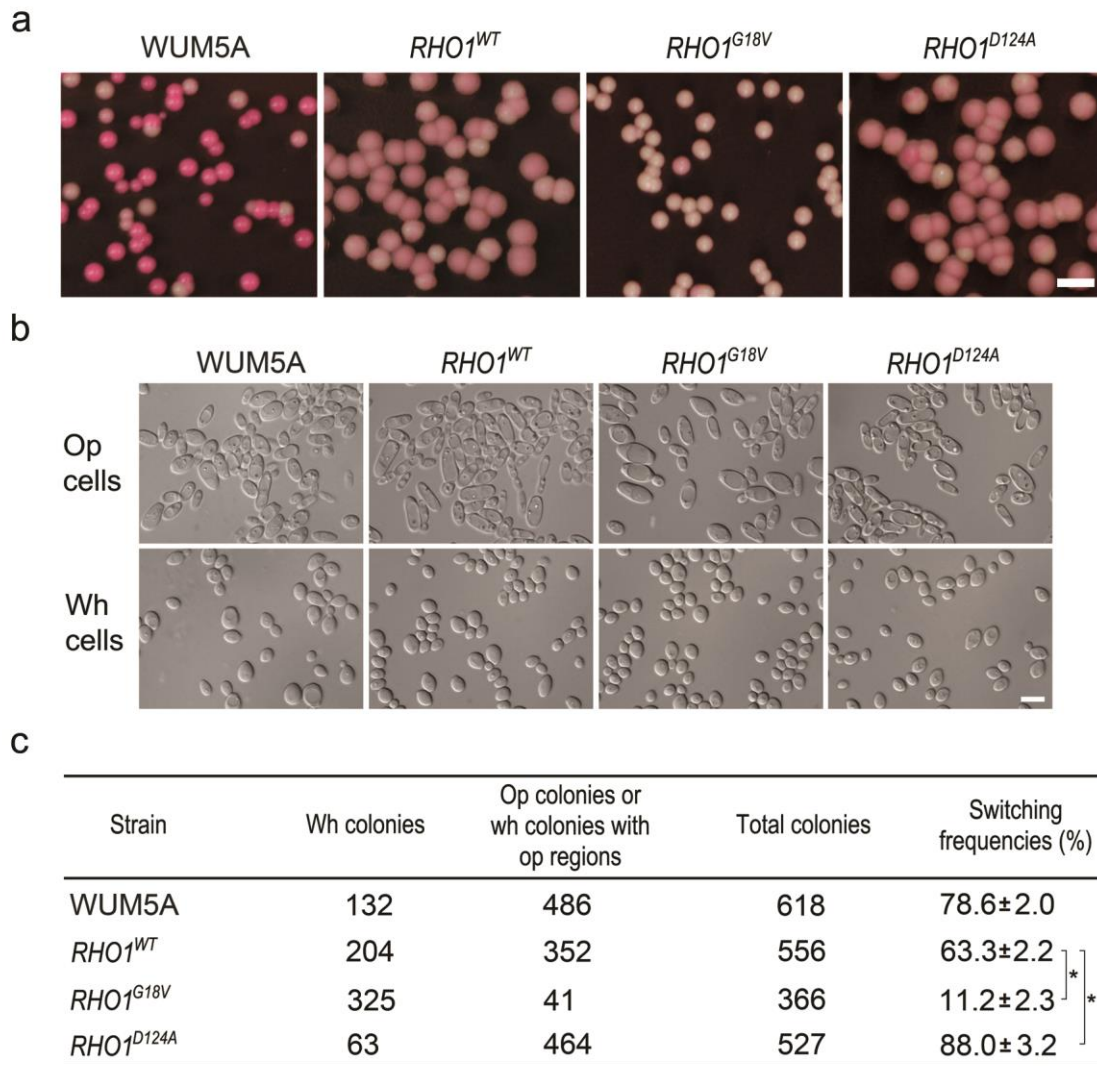

**Fig. S4:** Rho1 negatively regulates CO<sub>2</sub>-induced white-to-opaque switching. **(a)** Cells of WUM5A or WUM5A transformed with *RHO1*<sup>WT</sup> (YSL617), *RHO1*<sup>G18V</sup> (YSL608), or *RHO1*<sup>D124A</sup> (YSL613) were grown on Lee's glucose plates (pH6.0, +PB) in the presence of 5% CO<sub>2</sub> at 25°C in the dark for 4 days. Colonies formed by each strain were photographed and representative images are shown. **(b)** Representative images of white and opaque cells from the indicated strains. **(c)** CO<sub>2</sub>-induced white-to-opaque switching frequency for WUM5A, WUM5A transformed with *RHO1*<sup>WT</sup>, *RHO1*<sup>G18V</sup>, or *RHO1*<sup>D124A</sup> strains. \*, p<0.05 (Student's *t*-test).

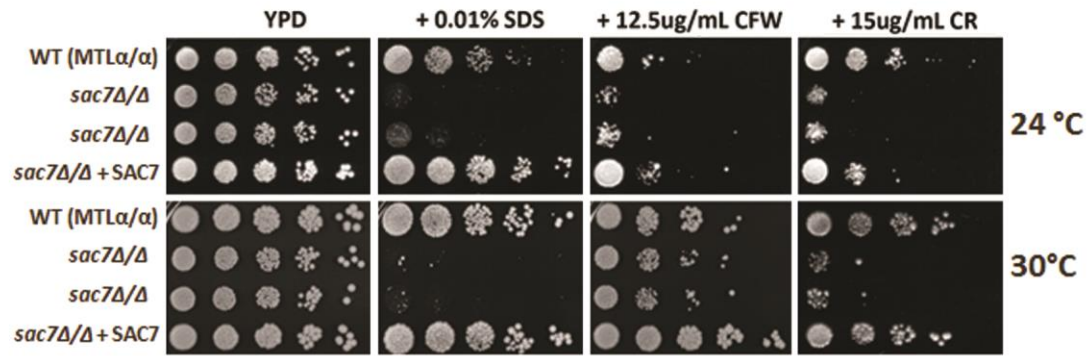

**Fig. S5:** Wild-type (WUM5A), *sac7* $\Delta/\Delta$  (YSL504) and *sac7* $\Delta/\Delta$ +SAC7 (YSL532) were grown in YPD at 30 °C overnight. The cultures were then adjusted to OD<sub>600</sub>=1, and subjected to 10 time dilution, followed by 5 times serial dilutions. 3 ul of the diluted cultures were spotted on plates of YPD, YPD with 0.01% SDS, YPD with 12.5  $\mu$ g/ml calcofluor white (CFW), YPD with 15  $\mu$ g/ml congo red (CR), and incubated at 25 °C and 30 °C for 2-3 days.

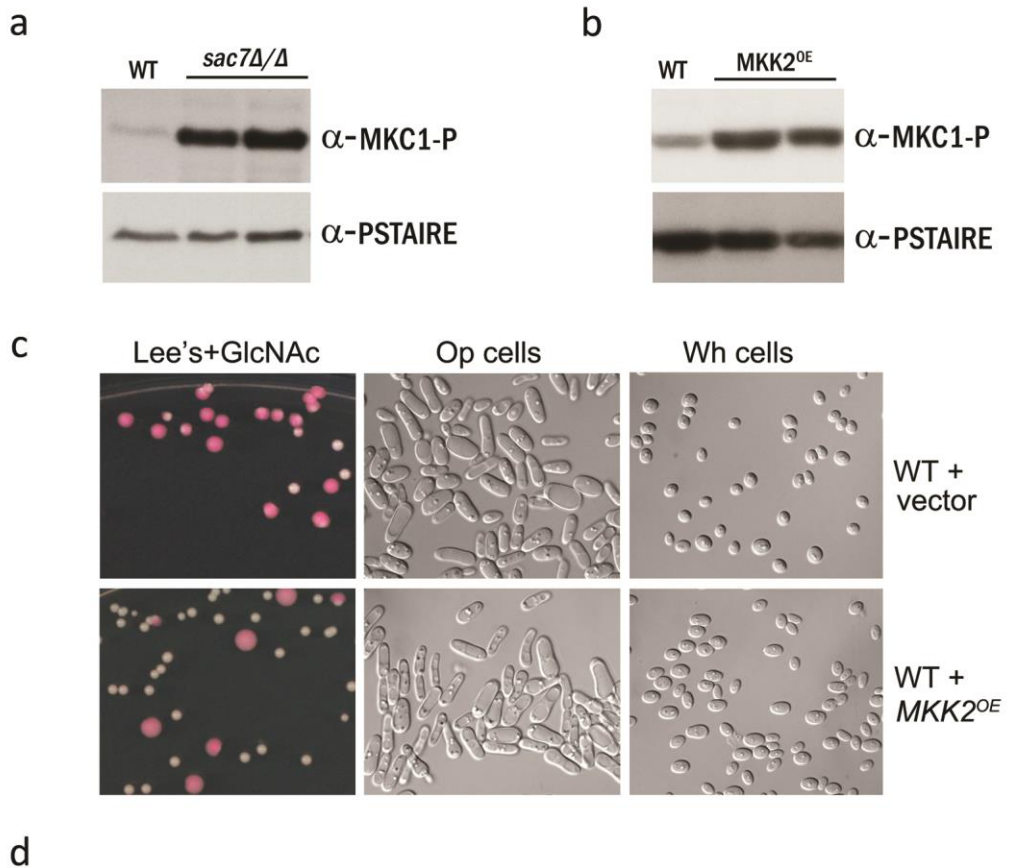

**Fig. S6:** (a and b) Increase of Mkc1 phosphorylation level in *sac7Δ/Δ* (a) and *MKK2* overexpression (b) cells. Protein extracts were prepared from WT (WUM5A), *sac7Δ/Δ* (YSL504), and *MKK2* overexpression (YSL643) cells and subjected to Western analysis with anti-phosphorylated-Mkc1 antibody (Cell Signaling). The same membrane was striped and probed with anti-Cdc28 antibody ( $\alpha$ -PSTAIRE, Santa Cruz) to serve as loading control. (c) WT cells transformed with empty vector (pYGS860) or *MKK2* overexpression plasmid (pYSL93) were spread onto Lee's GlcNAc (pH 6, +PB) and incubated at 25°C in dark for 6 days before photography. Cells from red and white colonies of each strain were suspended into water and examined under a microscope for image acquisition. (d) White and red colonies ( including white colonies with red regions ) of each strain were counted for the calculation of white-to-opaque switching frequency. \*,  $p < 0.05$  (Student's *t*-test).



**Supplementary Table 1. Yeast strains used in this study**

| Strain  | Genotype/Description                                                                                                                                      | Source/Parent |
|---------|-----------------------------------------------------------------------------------------------------------------------------------------------------------|---------------|
| GZY803  | <i>MTLα his4 ura3Δ::HIS4</i>                                                                                                                              | (1)           |
| GZY885  | <i>(gpb1Δ) MTLα his4 ura3Δ::HIS4 gpb1Δ::UFP</i> ; deletion of <i>GPB1</i> in GZY803 by using pYGS1084                                                     | GZY803        |
| GZY886  | <i>(msb3Δ) MTLα his4 ura3Δ::HIS4 msb3Δ::UFP</i> ; deletion of <i>MSB3</i> in GZY803 by using pYGS1087                                                     | GZY803        |
| GZY887  | <i>(rho2Δ) MTLα his4 ura3Δ::HIS4 rho2Δ::UFP</i> ; deletion of <i>RHO2</i> in GZY803 by using pYGS1086                                                     | GZY803        |
| GZY893  | <i>(ira2Δ) MTLα his4 ura3Δ::HIS4 ira2Δ::UFP</i> ; deletion of <i>IRA2</i> in GZY803 by using pYGS1089                                                     | GZY803        |
| GZY895  | <i>(ypt52Δ) MTLα his4 ura3Δ::HIS4 ypt52Δ::UFP</i> ; deletion of <i>YPT52</i> in GZY803 by using pYGS1091                                                  | GZY803        |
| GZY897  | <i>(roy1Δ) MTLα his4 ura3Δ::HIS4 roy1Δ::UFP</i> ; deletion of <i>ROY1</i> in GZY803 by using pYGS1093                                                     | GZY803        |
| GZY898  | <i>(rgd2Δ) MTLα his4 ura3Δ::HIS4 rgd2Δ::UFP</i> ; deletion of <i>RGD2</i> in GZY803 by using pYGS1090                                                     | GZY803        |
| GZY903  | <i>(GZY803+URA3) MTLα his4 ura3Δ::HIS4 URA3</i> ; integration of pYGS860 into GZY803                                                                      | GZY803        |
| GZY904  | <i>(dmn1Δ) MTLα his4 ura3Δ::HIS4 dmn1Δ::UFP</i> ; deletion of <i>DMN1</i> in GZY803 by using pYGS1100                                                     | GZY803        |
| GZY905  | <i>(orf19.3216Δ) MTLα his4 ura3Δ::HIS4 orf19.3216Δ::UFP</i> ; deletion of <i>ORF19.3216</i> in GZY803 by using pYGS1103                                   | GZY803        |
| GZY908  | <i>(yrb30Δ) MTLα his4 ura3Δ::HIS4 yrb30Δ::UFP</i> ; deletion of <i>YRB30</i> in GZY803 by using pYGS1104                                                  | GZY803        |
| GZY912  | <i>(arl1Δ) MTLα his4 ura3Δ::HIS4 arl1Δ::UFP</i> ; deletion of <i>ARL1</i> in GZY803 by using pYGS1108                                                     | GZY803        |
| GZY913  | <i>(arl3Δ) MTLα his4 ura3Δ::HIS4 arl3Δ::UFP</i> ; deletion of <i>ARL3</i> in GZY803 by using pYGS1109                                                     | GZY803        |
| GZY915  | <i>(guf1Δ) MTLα his4 ura3Δ::HIS4 guf1Δ::UFP</i> ; deletion of <i>GUF1</i> in GZY803 by using pYGS1112                                                     | GZY803        |
| GZY916  | <i>(sac7Δ) MTLα his4 ura3Δ::HIS4 sac7Δ::UFP</i> ; deletion of <i>SAC7</i> in GZY803 by using pYGS1088                                                     | GZY803        |
| GZY950  | <i>(sac7Δ) MTLα his4 ura3Δ::HIS4 sac7Δ::FRT</i> ; loop out of <i>URA3</i> from GZY916                                                                     | GZY916        |
| GZY1092 | <i>(sac7Δ+URA3) MTLα his4 ura3Δ::HIS4 sac7Δ::FRT URA3</i> ; integration of pYGS860 into GZY950                                                            | GZY950        |
| GZY1121 | <i>(GZY803+URA3+dTMT) MTLα his4 ura3Δ::HIS4 URA3 OP4::dTomato-SAT1</i> ; integration of pYSL54 into GZY903                                                | GZY903        |
| GZY1141 | <i>(sac7Δ+URA3+dTMT) MTLα his4 ura3Δ::HIS4 sac7Δ::FRT URA3 OP4::dTomato-SAT1</i> ; integration of pYSL54 into GZY1092                                     | GZY1092       |
| GZY1146 | <i>(sac7Δ+SAC7) MTLα his4 ura3Δ::HIS4 sac7Δ::FRT sac7::SAC7-URA3</i> ; integration of pYSL60 into GZY950                                                  | GZY950        |
| GZY1153 | <i>(sac7Δ+SAC7+dTMT) MTLα his4 ura3Δ::HIS4 sac7Δ::FRT sac7::SAC7-URA3 OP4::dTomato-SAT1</i> ; integration of pYSL54 into GZY1146                          | GZY1146       |
| GZY1130 | <i>(sac7Δ+WOR1<sup>OE</sup>+dTMT) MTLα his4 ura3Δ::HIS4 sac7Δ::FRT wor1::TetO-Myc-WOR1-TetR-URA3 OP4::dTomato-SAT1</i> ; integration of pYSL54 into YSL36 | YSL36         |
| YGJ01   | <i>(yip4Δ) MTLα his4 ura3Δ::HIS4 yip4Δ::UFP</i> ; deletion of <i>YIP4</i> in GZY803 by using pGJX01                                                       | GZY803        |
| YGJ02   | <i>(yip5Δ) MTLα his4 ura3Δ::HIS4 yip5Δ::UFP</i> ; deletion of <i>YIP5</i> in GZY803 by using pGJX02                                                       | GZY803        |
| YGJ03   | <i>(ypt6Δ) MTLα his4 ura3Δ::HIS4 ypt6Δ::UFP</i> ; deletion of <i>YPT6</i> in GZY803 by using pGJX03                                                       | GZY803        |
| YGJ04   | <i>(nug1Δ) MTLα his4 ura3Δ::HIS4 nug1Δ::UFP</i> ; deletion of <i>NUG1</i> in GZY803 by using pGJX04                                                       | GZY803        |
| YGJ05   | <i>(glo3Δ) MTLα his4 ura3Δ::HIS4 glo3Δ::UFP</i> ; deletion of <i>GLO3</i> in GZY803 by using pGJX05                                                       | GZY803        |
| YGJ06   | <i>(age2Δ) MTLα his4 ura3Δ::HIS4 age2Δ::UFP</i> ; deletion of <i>AGE2</i> in GZY803 by using pGJX06                                                       | GZY803        |
| YHZ01   | <i>(gyp1Δ) MTLα his4 ura3Δ::HIS4 gyp1Δ::UFP</i> ; deletion of <i>GYP1</i> in GZY803 by using pHZX01                                                       | GZY803        |
| YHZ02   | <i>(gyp5Δ) MTLα his4 ura3Δ::HIS4 gyp5Δ::UFP</i> ; deletion of <i>GYP5</i> in GZY803 by using pHZX02                                                       | GZY803        |



|        |                                                                                                                                                                                                 |        |
|--------|-------------------------------------------------------------------------------------------------------------------------------------------------------------------------------------------------|--------|
| YHZ03  | ( <i>gyp6Δ</i> ) <i>MTLα his4 ura3Δ::HIS4 gyp6Δ::UFP</i> ; deletion of <i>GYP6</i> in GZY803 by using pHZX03                                                                                    | GZY803 |
| YHZ04  | ( <i>gyp8Δ</i> ) <i>MTLα his4 ura3Δ::HIS4 gyp8Δ::UFP</i> ; deletion of <i>GYP8</i> in GZY803 by using pHZX04                                                                                    | GZY803 |
| YWH01  | ( <i>vtc1Δ</i> ) <i>MTLα his4 ura3Δ::HIS4 vtc1Δ::UFP</i> ; deletion of <i>VTC1</i> in GZY803 by using pWHT01                                                                                    | GZY803 |
| YWH02  | ( <i>mdr1Δ</i> ) <i>MTLα his4 ura3Δ::HIS4 mdr1Δ::UFP</i> ; deletion of <i>MDR1</i> in GZY803 by using pWHT02                                                                                    | GZY803 |
| YWH03  | ( <i>rho4Δ</i> ) <i>MTLα his4 ura3Δ::HIS4 rho4Δ::UFP</i> ; deletion of <i>RHO4</i> in GZY803 by using pWHT03                                                                                    | GZY803 |
| YWH04  | ( <i>bem2Δ</i> ) <i>MTLα his4 ura3Δ::HIS4 bem2Δ::UFP</i> ; deletion of <i>BEM2</i> in GZY803 by using pWHT04                                                                                    | GZY803 |
| YWH05  | ( <i>hbs1Δ</i> ) <i>MTLα his4 ura3Δ::HIS4 hbs1Δ::UFP</i> ; deletion of <i>HBS1</i> in GZY803 by using pWHT05                                                                                    | GZY803 |
| YWH06  | ( <i>trs120Δ</i> ) <i>MTLα his4 ura3Δ::HIS4 trs120Δ::UFP</i> ; deletion of <i>TRS120</i> in GZY803 by using pWHT06                                                                              | GZY803 |
| YWH07  | ( <i>trs130Δ</i> ) <i>MTLα his4 ura3Δ::HIS4 trs130Δ::UFP</i> ; deletion of <i>TRS130</i> in GZY803 by using pWHT07                                                                              | GZY803 |
| YWH08  | ( <i>gem1Δ</i> ) <i>MTLα his4 ura3Δ::HIS4 gem1Δ::UFP</i> ; deletion of <i>GEM1</i> in GZY803 by using pWHT08                                                                                    | GZY803 |
| YWH09  | ( <i>arf1Δ</i> ) <i>MTLα his4 ura3Δ::HIS4 arf1Δ::UFP</i> ; deletion of <i>ARF1</i> in GZY803 by using pWHT09                                                                                    | GZY803 |
| YWH10  | ( <i>rho3Δ</i> ) <i>MTLα his4 ura3Δ::HIS4 rho3Δ::UFP</i> ; deletion of <i>RHO3</i> in GZY803 by using pWHT10                                                                                    | GZY803 |
| YWH11  | ( <i>lrg1Δ</i> ) <i>MTLα his4 ura3Δ::HIS4 lrg1Δ::UFP</i> ; deletion of <i>LRG1</i> in GZY803 by using pWHT11                                                                                    | GZY803 |
| WUM5A  | (GH1322) <i>MTLα/α ura3Δ::FRT/ura3Δ::FRT</i>                                                                                                                                                    | (2)    |
| YSL36  | ( <i>sac7Δ+WOR1<sup>OE</sup></i> ) <i>MTLα his4 ura3Δ::HIS4 sac7Δ::FRT wor1::TetO-Myc-WOR1-TetR-URA3</i> ; integration of pYSL06 into GZY950                                                    | GZY950 |
| YSL501 | <i>MTLα/α ura3Δ::FRT/ura3Δ::FRT SAC7/sac7Δ::UFP</i> ; deletion of <i>SAC7</i> in WUM5A by using pYGS1088                                                                                        | WUM5A  |
| YSL502 | <i>MTLα/α ura3Δ::FRT/ura3Δ::FRT SAC7/sac7Δ::FRT</i> ; loop out of <i>URA3</i> from YSL501                                                                                                       | YSL501 |
| YSL503 | ( <i>sac7Δ/Δ</i> ) <i>MTLα/α ura3Δ::FRT/ura3Δ::FRT sac7Δ::UFP/sac7Δ::FRT</i> ; deletion of <i>SAC7</i> in YSL502 by using pYSL21                                                                | YSL502 |
| YSL504 | ( <i>sac7Δ/Δ</i> ) <i>MTLα/α ura3Δ::FRT/ura3Δ::FRT sac7Δ::FRT/sac7Δ::FRT</i> ; loop out of <i>URA3</i> from YSL503                                                                              | YSL503 |
| YSL505 | ( <i>sac7Δ/Δ+WOR1<sup>OE</sup></i> ) <i>MTLα/α ura3Δ::FRT/ura3Δ::FRT sac7Δ::FRT/sac7Δ::FRT WOR1/wor1::TetO-Myc-WOR1-TetR-URA3</i> ; integration of pYSL06 into YSL504                           | YSL504 |
| YSL509 | (WUM5A+vector) ; <i>MTLα/α ura3Δ::FRT/ura3Δ::FRT URA3</i> ; integration of pYGS860 into WUM5A                                                                                                   | WUM5A  |
| YSL512 | (WUM5A+SAC7 <sup>OE</sup> ) <i>MTLα/α ura3Δ::FRT/ura3Δ::FRT SAC7/sac7::TetO-Myc-SAC7-TetR-URA3</i> ; integration of pYSL153 into WUM5A                                                          | WUM5A  |
| YSL532 | ( <i>sac7Δ/Δ+SAC7</i> ) <i>MTLα/α ura3Δ::FRT/ura3Δ::FRT sac7Δ::FRT/sac7Δ::SAC7-URA3</i> ; integration of pYSL60 into YSL504                                                                     | YSL504 |
| YSL564 | ( <i>Myc-RHO1<sup>D124A</sup></i> ) <i>MTLα/α ura3Δ::FRT/ura3Δ::FRT RHO1/rho1::TetO-Myc- RHO1<sup>D124A</sup>-TetR-URA3</i> ; integration of pYGS1279 into WUM5A                                | WUM5A  |
| YSL570 | ( <i>Myc-RHO1<sup>G18V</sup></i> ) <i>MTLα/α ura3Δ::FRT/ura3Δ::FRT RHO1/rho1::TetO-Myc- RHO1<sup>G18V</sup>-TetR-URA3</i> ; integration of pYGS1280 into WUM5A                                  | WUM5A  |
| YSL601 | ( <i>Myc-RHO1<sup>G18V</sup>+SAC7-HA</i> ) <i>MTLα/α ura3Δ::FRT/ura3Δ::FRT RHO1/rho1::TetO-Myc- RHO1<sup>G18V</sup>-TetR-URA3 SAC7/sac7::SAC7-HA-SAT1</i> ; integration of pYSL79 into YSL570   | YSL570 |
| YSL607 | ( <i>SAC7-HA</i> ) <i>MTLα/α ura3Δ::FRT/ura3Δ::FRT SAC7/sac7::SAC7-HA-SAT1</i> ; integration of pYSL79 into WUM5A                                                                               | WUM5A  |
| YSL608 | ( <i>RHO1<sup>G18V</sup></i> ) <i>MTLα/α ura3Δ::FRT/ura3Δ::FRT RHO1/rho1::Myc-RHO1<sup>G18V</sup>-URA3</i> ; integration of pYSL82 into WUM5A                                                   | WUM5A  |
| YSL609 | ( <i>Myc-RHO1<sup>D124A</sup>+SAC7-HA</i> ) <i>MTLα/α ura3Δ::FRT/ura3Δ::FRT RHO1/rho1::TetO-Myc- RHO1<sup>D124A</sup>-TetR-URA3 SAC7/sac7::SAC7-HA-SAT1</i> ; integration of pYSL79 into YSL564 | YSL564 |

|        |                                                                                                                                                                                                                            |        |
|--------|----------------------------------------------------------------------------------------------------------------------------------------------------------------------------------------------------------------------------|--------|
| YSL613 | ( <i>RHO1</i> <sup>D124A</sup> ) <i>MTLα/α ura3Δ::FRT/ura3Δ::FRT RHO1/rho1::Myc-RHO1</i> <sup>D124A</sup> - <i>URA3</i> ; integration of pYSL84 into WUM5A                                                                 | WUM5A  |
| YSL616 | ( <i>RHO1</i> <sup>G18V</sup> + <i>WOR1</i> <sup>OE</sup> ) <i>MTLα/α ura3Δ::FRT/ura3Δ::FRT RHO1/rho1::Myc-RHO1</i> <sup>G18V</sup> - <i>URA3 WOR1/wor1::TetO-Myc-WOR1-TetR-SAT1</i> ; integration of pYGS1312 into YSL608 | YSL608 |
| YSL617 | ( <i>RHO1</i> <sup>WT</sup> ) <i>MTLα/α ura3Δ::FRT/ura3Δ::FRT RHO1/rho1::Myc-RHO1-URA3</i> ; integration of pYGS1315 into WUM5A                                                                                            | WUM5A  |
| YSL619 | <i>MTLα/α ura3Δ::FRT/ura3Δ::FRT RAS1/ras1Δ::UFP sac7Δ::FRT/sac7Δ::FRT</i> ; deletion of <i>RAS1</i> in YSL504 by using pYGS1317                                                                                            | YSL504 |
| YSL621 | <i>MTLα/α ura3Δ::FRT/ura3Δ::FRT RAS1/ras1Δ::FRT sac7Δ::FRT/sac7Δ::FRT</i> ; loop out of <i>URA3</i> from YSL619                                                                                                            | YSL619 |
| YSL623 | ( <i>ras1Δ/Δ sac7Δ/Δ</i> ) <i>MTLα/α ura3Δ::FRT/ura3Δ::FRT ras1Δ::UFP/ras1Δ::FRT sac7Δ::FRT/sac7Δ::FRT</i> , deletion of <i>RAS1</i> in YSL621 by using pYGS1318                                                           | YSL621 |
| YSL634 | <i>MTLα/α ura3Δ::FRT/ura3Δ::FRT RAS1/ras1Δ::UFP</i> ; deletion of <i>RAS1</i> in WUM5A by using pYGS1317                                                                                                                   | WUM5A  |
| YSL637 | <i>MTLα/α ura3Δ::FRT/ura3Δ::FRT RAS1/ras1Δ::FRT</i> ; loop out of <i>URA3</i> from YSL634                                                                                                                                  | YSL634 |
| YSL639 | ( <i>ras1Δ/Δ</i> ) <i>MTLα/α ura3Δ::FRT/ura3Δ::FRT ras1Δ::UFP/ras1Δ::FRT</i> ; deletion of <i>RAS1</i> in GH1322 by using pYGS1318                                                                                         | YSL637 |
| YSL643 | WUM5A+ <i>MKK2</i> <sup>OE</sup> ; <i>MTLα/α ura3Δ::FRT/ura3Δ::FRT MEK1/mek1::TetO-Myc-MEK1-TetR-URA3</i> ; integration of pYSL93 into WUM5A                                                                               | WUM5A  |

- 
1. Hickman, M.A., Zeng, G., Forche, A., Hirakawa, M.P., Abbey, D., Harrison, B.D., Wang, Y.M., Su, C.H., Bennett, R.J., Wang, Y., Berman, J. The 'obligate diploid' *Candida albicans* forms mating competent haploids. *Nature*. 7: 55-9 (2013).
  2. Strauss, A., Michel, S., Morschhauser, J. Analysis of phase-specific gene expression at the single-cell level in the white-opaque switching system of *Candida albicans*. *J Bacteriol.* 183: 3761-3769 (2001).

## Supplementary Table 2. Plasmid constructs used in this study

| Construct | Description                                                                                                                                                                                                                                                                                                                                                                                                                                                                                                        |
|-----------|--------------------------------------------------------------------------------------------------------------------------------------------------------------------------------------------------------------------------------------------------------------------------------------------------------------------------------------------------------------------------------------------------------------------------------------------------------------------------------------------------------------------|
| CIP10U    | <i>C. albicans</i> integration vector with <i>URA3</i> as the selection marker; generated by replacing the <i>RP10</i> gene in the vector Clp10 <sup>1</sup> with 700 bp <i>GAL4</i> untranslated region ( <i>UTR</i> ) at <i>Clal</i> and <i>PstI</i> .                                                                                                                                                                                                                                                           |
| pYGS860   | <i>UTR</i> */ <i>CIP10U</i> ; an <i>Ascl</i> site was generated at the middle of <i>UTR</i> by site-directed mutagenesis and used to linearize the plasmid for integration.                                                                                                                                                                                                                                                                                                                                        |
| pYGS1084  | <i>GPB1Δ::UFP/pBKS</i> ; <i>GPB1</i> promoter region (~500 bp) and terminator region (~400 bp) were PCR-amplified and cloned into the vector pBKS at <i>KpnI-XhoI</i> and <i>NotI-SacI</i> , respectively, to flank the <i>URA3</i> flipper <sup>2</sup> ( <i>UFP</i> ) located between <i>XhoI</i> and <i>NotI</i> . The knock-out cassette was released by <i>KpnI</i> and <i>SacI</i> for transformation to generate <i>gpb1Δ::UFP</i> .                                                                        |
| pYGS1086  | <i>RHO2Δ::UFP/pBKS</i> ; the plasmid was constructed in the same way as pYGS1084. The knock-out cassette was released by <i>KpnI</i> and <i>SacI</i> for transformation to generate <i>rho2Δ::UFP</i> .                                                                                                                                                                                                                                                                                                            |
| pYGS1087  | <i>MSB3Δ::UFP/pBKS</i> ; the plasmid was constructed in the same way as pYGS1084. The knock-out cassette was released by <i>KpnI</i> and <i>SacI</i> for transformation to generate <i>msb3Δ::UFP</i> .                                                                                                                                                                                                                                                                                                            |
| pYGS1088  | <i>SAC7Δ::UFP/pBKS</i> #1; the plasmid was constructed in the same way as pYGS1084. The knock-out cassette was released by <i>KpnI</i> and <i>SacI</i> for transformation to generate <i>sac7Δ::UFP</i> and <i>sac7Δ::FRT</i> .                                                                                                                                                                                                                                                                                    |
| pYGS1089  | <i>IRA2Δ::UFP/pBKS</i> ; the plasmid was constructed in the same way as pYGS1084. The knock-out cassette was released by <i>KpnI</i> and <i>SacI</i> for transformation to generate <i>ira2Δ::UFP</i> .                                                                                                                                                                                                                                                                                                            |
| pYGS1090  | <i>RGD2Δ::UFP/pBKS</i> ; the plasmid was constructed in the same way as pYGS1084. The knock-out cassette was released by <i>KpnI</i> and <i>SacI</i> for transformation to generate <i>rgd2Δ::UFP</i> .                                                                                                                                                                                                                                                                                                            |
| pYGS1091  | <i>YPT52Δ::UFP/pBKS</i> ; the plasmid was constructed in the same way as pYGS1084. The knock-out cassette was released by <i>KpnI</i> and <i>SacI</i> for transformation to generate <i>ypt52Δ::UFP</i> .                                                                                                                                                                                                                                                                                                          |
| pYGS1093  | <i>ROY1Δ::UFP/pBKS</i> ; the plasmid was constructed in the same way as pYGS1084. The knock-out cassette was released by <i>KpnI</i> and <i>SacI</i> for transformation to generate <i>roy1Δ::UFP</i> .                                                                                                                                                                                                                                                                                                            |
| pYGS1100  | <i>DMN1Δ::UFP/pBKS</i> ; the plasmid was constructed in the same way as pYGS1084. The knock-out cassette was released by <i>KpnI</i> and <i>SacI</i> for transformation to generate <i>dnn1Δ::UFP</i> .                                                                                                                                                                                                                                                                                                            |
| pYGS1103  | <i>ORF19.3216Δ::UFP/pBKS</i> ; the plasmid was constructed in the same way as pYGS1084. The knock-out cassette was released by <i>KpnI</i> and <i>SacI</i> for transformation to generate <i>orf19.3216Δ::UFP</i> .                                                                                                                                                                                                                                                                                                |
| pYGS1104  | <i>YRB30Δ::UFP/pBKS</i> ; the plasmid was constructed in the same way as pYGS1084. The knock-out cassette was released by <i>KpnI</i> and <i>SacI</i> for transformation to generate <i>yrb30Δ::UFP</i> .                                                                                                                                                                                                                                                                                                          |
| pYGS1108  | <i>ARL1Δ::UFP/pBKS</i> ; the plasmid was constructed in the same way as pYGS1084. The knock-out cassette was released by <i>KpnI</i> and <i>SacI</i> for transformation to generate <i>arl1Δ::UFP</i> .                                                                                                                                                                                                                                                                                                            |
| pYGS1109  | <i>ARL3Δ::UFP/pBKS</i> ; the plasmid was constructed in the same way as pYGS1084. The knock-out cassette was released by <i>KpnI</i> and <i>SacI</i> for transformation to generate <i>arl3Δ::UFP</i> .                                                                                                                                                                                                                                                                                                            |
| pYGS1112  | <i>GUF1Δ::UFP/pBKS</i> ; the plasmid was constructed in the same way as pYGS1084. The knock-out cassette was released by <i>KpnI</i> and <i>SacI</i> for transformation to generate <i>guf1Δ::UFP</i> .                                                                                                                                                                                                                                                                                                            |
| pYGS1244  | TetO-Myc-RHO1 <sup>WT</sup> - <i>UTR</i> *-TetR/ <i>CIP10U</i> ; <i>RHO1</i> coding region including its terminator (1 to 1097 bp) was PCR-amplified and cloned into pYSL06 at <i>Clal-PstI</i> to replace <i>WOR1n</i> . <i>UTR</i> * was then PCR-amplified and cloned at <i>PacI-PstI</i> to replace part of <i>RHO1</i> terminator. The plasmid was linearized by <i>Ascl</i> within <i>UTR</i> * for integration to express <i>RHO1</i> .                                                                     |
| pYGS1254  | <i>P<sub>OP4</sub>-dTomato-UTR/CIP10U</i> ; the <i>C. albicans</i> codon-optimized <i>dTomato</i> <sup>3</sup> was PCR-amplified and cloned into <i>CIP10U</i> at <i>XhoI-Clal</i> , followed by <i>UTR</i> (cloned at <i>Clal</i> and <i>PstI</i> ). The promoter of <i>OP4</i> (-600 to -1 bp, <i>P<sub>OP4</sub></i> ) was PCR-amplified and cloned at <i>KpnI-XhoI</i> to control the expression of <i>dTomato</i> . The plasmid was linearized by <i>BsaBI</i> within <i>P<sub>OP4</sub></i> for integration. |
| pYGS1279  | TetO-Myc-RHO1 <sup>D124A</sup> - <i>UTR</i> *-TetR/ <i>CIP10U</i> ; pYGS1244 was used as the template for site-directed mutagenesis to introduce D124A mutation on <i>RHO1</i> . The plasmid was linearized by <i>Ascl</i> within <i>UTR</i> * for integration to express <i>RHO1</i> <sup>D124A</sup> .                                                                                                                                                                                                           |
| pYGS1280  | TetO-Myc-RHO1 <sup>G18V</sup> - <i>UTR</i> *-TetR/ <i>CIP10U</i> ; pYGS1244 was used as the template for site-directed mutagenesis to introduce G18V mutation on <i>RHO1</i> . The plasmid was linearized by <i>Ascl</i> within <i>UTR</i> * for integration to express <i>RHO1</i> <sup>G18V</sup> .                                                                                                                                                                                                              |
| pYGS1312  | TetO-Myc- <i>WOR1n</i> -TetR/ <i>CIP10SAT1</i> ; <i>SAT1</i> from pYSL54 was cloned into pYSL06 at <i>MluI-NotI</i> to replace the <i>URA3</i> marker. The plasmid was linearized by <i>BstEII</i> within <i>WOR1n</i> for integration to overexpress <i>WOR1</i> in the absence of doxycycline.                                                                                                                                                                                                                   |

pYGS1315 Pro-Myc-RHO1<sup>WT</sup>-UTR\*/CIP10U; the *RHO1* promoter region (-800 to -1 bp) was PCR-amplified and cloned into CIP10U at *KpnI*-*XhoI* to control the expression of a 6xMyc epitope (cloned at *XhoI*-*Clal*). *RHO1* coding region including its terminator (1 to 842 bp) was then PCR-amplified and cloned at *Clal*-*PacI* to fuse in frame with the *Myc* epitope, and followed by *UTR\** cloned at *PacI*-*PstI*. The plasmid was linearized by *StuI* within the *RHO1* promoter region for integration.

pYGS1317 RAS1Δ::UFP/pBKS #1; the plasmid was constructed in the same way as pYGS1084. The knock-out cassette was released by *KpnI* and *SacI* for transformation to generate *ras1Δ::UFP* and *ras1Δ::FRT*.

pYGS1318 RAS1Δ::UFP/pBKS #2; a C-terminal region of *RAS1* (376-873 bp) was PCR-amplified and cloned into pYGS1317 at *NotI*-*SacI* to replace the terminator region. The knock-out cassette was released by *KpnI* and *SacI* for transformation to generate *ras1Δ::UFP* and *ras1Δ::FRT*.

pGJX01 YIP4Δ::UFP/pBKS; the plasmid was constructed in the same way as pYGS1084. The knock-out cassette was released by *KpnI* and *SacI* for transformation to generate *yip4Δ::UFP*.

pGJX02 YIP5Δ::UFP/pBKS; the plasmid was constructed in the same way as pYGS1084. The knock-out cassette was released by *KpnI* and *SacI* for transformation to generate *yip5Δ::UFP*.

pGJX03 YPT6Δ::UFP/pBKS; the plasmid was constructed in the same way as pYGS1084. The knock-out cassette was released by *KpnI* and *SacI* for transformation to generate *ypt6Δ::UFP*.

pGJX04 NUG1Δ::UFP/pBKS; the plasmid was constructed in the same way as pYGS1084. The knock-out cassette was released by *KpnI* and *SacI* for transformation to generate *nug1Δ::UFP*.

pGJX05 GLO3Δ::UFP/pBKS; the plasmid was constructed in the same way as pYGS1084. The knock-out cassette was released by *KpnI* and *SacI* for transformation to generate *glo3Δ::UFP*.

pGJX06 AGE2Δ::UFP/pBKS; the plasmid was constructed in the same way as pYGS1084. The knock-out cassette was released by *KpnI* and *SacI* for transformation to generate *age2Δ::UFP*.

pHZX01 GYP1Δ::UFP/pBKS; the plasmid was constructed in the same way as pYGS1084. The knock-out cassette was released by *KpnI* and *SacI* for transformation to generate *gyp1Δ::UFP*.

pHZX02 GYP5Δ::UFP/pBKS; the plasmid was constructed in the same way as pYGS1084. The knock-out cassette was released by *KpnI* and *SacI* for transformation to generate *gyp5Δ::UFP*.

pHZX03 GYP6Δ::UFP/pBKS; the plasmid was constructed in the same way as pYGS1084. The knock-out cassette was released by *KpnI* and *SacI* for transformation to generate *gyp6Δ::UFP*.

pHZX04 GYP8Δ::UFP/pBKS; the plasmid was constructed in the same way as pYGS1084. The knock-out cassette was released by *KpnI* and *SacI* for transformation to generate *gyp8Δ::UFP*.

pWHT01 VTC1Δ::UFP/pBKS; the plasmid was constructed in the same way as pYGS1084. The knock-out cassette was released by *KpnI* and *SacI* for transformation to generate *vtc1Δ::UFP*.

pWHT02 MDR1Δ::UFP/pBKS; the plasmid was constructed in the same way as pYGS1084. The knock-out cassette was released by *KpnI* and *SacI* for transformation to generate *mdr1Δ::UFP*.

pWHT03 RHO4Δ::UFP/pBKS; the plasmid was constructed in the same way as pYGS1084. The knock-out cassette was released by *KpnI* and *SacI* for transformation to generate *rho4Δ::UFP*.

pWHT04 BEM2Δ::UFP/pBKS; the plasmid was constructed in the same way as pYGS1084. The knock-out cassette was released by *KpnI* and *SacI* for transformation to generate *bem2Δ::UFP*.

pWHT05 HBS1Δ::UFP/pBKS; the plasmid was constructed in the same way as pYGS1084. The knock-out cassette was released by *KpnI* and *SacI* for transformation to generate *hbs1Δ::UFP*.

pWHT06 TRS120Δ::UFP/pBKS; the plasmid was constructed in the same way as pYGS1084. The knock-out cassette was released by *KpnI* and *SacI* for transformation to generate *trs120Δ::UFP*.

pWHT07 TRS130Δ::UFP/pBKS; the plasmid was constructed in the same way as pYGS1084. The knock-out cassette was released by *KpnI* and *SacI* for transformation to generate *trs130Δ::UFP*.

pWHT08 GEM1Δ::UFP/pBKS; the plasmid was constructed in the same way as pYGS1084. The knock-out cassette was released by *KpnI* and *SacI* for transformation to generate *gem1Δ::UFP*.

pWHT09 ARF1Δ::UFP/pBKS; the plasmid was constructed in the same way as pYGS1084. The knock-out cassette was released by *KpnI* and *SacI* for transformation to generate *arf1Δ::UFP*.

pWHT10 RHO3Δ::UFP/pBKS; the plasmid was constructed in the same way as pYGS1084. The knock-out cassette was released by *KpnI* and *SacI* for transformation to generate *rho3Δ::UFP*.

pWHT11 LRG1Δ::UFP/pBKS; the plasmid was constructed in the same way as pYGS1084. The knock-out cassette was released by *KpnI* and *SacI* for transformation to generate *lrg1Δ::UFP*.



|         |                                                                                                                                                                                                                                                                                                                                                                                                                                                                                                                                                                                                                                                                                                                       |
|---------|-----------------------------------------------------------------------------------------------------------------------------------------------------------------------------------------------------------------------------------------------------------------------------------------------------------------------------------------------------------------------------------------------------------------------------------------------------------------------------------------------------------------------------------------------------------------------------------------------------------------------------------------------------------------------------------------------------------------------|
| pYSL06  | TetO-Myc-WOR1n-TetR/CIP10U; the tetracycline operator sequence ( <i>TetO</i> ) was cloned into CIP10U at <i>KpnI-XhoI</i> to control the expression of a 6xMyc epitope (cloned at <i>XhoI-Clal</i> ). The N-terminal coding region of <i>WOR1</i> (4 to 433 bp) was PCR-amplified and cloned at <i>Clal-PstI</i> to fuse in frame with the 6xMyc epitope. The tetracycline-repressible transactivator ( <i>TetR</i> ) was cloned after <i>WOR1</i> at <i>PstI-MluI</i> . Both <i>TetO</i> and <i>TetR</i> were PCR-amplified from the genomic DNA of JKC1141 <sup>4</sup> . The plasmid was linearized by <i>BstEII</i> within <i>WOR1n</i> for integration to overexpress <i>WOR1</i> in the absence of doxycycline. |
| pYSL21  | <i>SAC7Δ::UFP/pBKS #2</i> ; a C-terminal region of <i>SAC7</i> (1272-1848 bp) was PCR-amplified and cloned into pYGS1088 at <i>NotI-SacII</i> to replace the terminator region. The knock-out cassette was released by <i>KpnI</i> and <i>SacI</i> for transformation to generate <i>sac7Δ::UFP</i> and <i>sac7Δ::FRT</i> .                                                                                                                                                                                                                                                                                                                                                                                           |
| pYSL54  | <i>P<sub>OP4</sub>-dTomato-UTR/CIP10SAT1</i> ; the nourseothricin resistance marker <i>SAT1</i> was PCR-amplified from pNIM1 <sup>5</sup> and cloned into pYGS1254 at <i>MluI-NotI</i> to replace <i>URA3</i> . The plasmid was linearized by <i>BsaBI</i> within <i>P<sub>OP4</sub></i> for integration.                                                                                                                                                                                                                                                                                                                                                                                                             |
| pYSL60  | Pro- <i>SAC7-Ter/CIP10U</i> ; the <i>SAC7</i> gene (including its 900 bp promoter region and 455 bp terminator region) was PCR-amplified and cloned into CIP10U between <i>KpnI</i> and <i>Clal</i> . The plasmid was linearized by <i>BsaBI</i> within the promoter for integration.                                                                                                                                                                                                                                                                                                                                                                                                                                 |
| pYSL79  | <i>SAC7c-HA-UTR/CIP10SAT1</i> ; the C-terminal region of <i>SAC7</i> (849 to 1845 bp) was PCR-amplified and cloned into CIP10U at <i>KpnI-XhoI</i> to fuse in frame with a 2xHA epitope (cloned at <i>XhoI-Clal</i> ) and followed by <i>UTR</i> (cloned at <i>Clal-PstI</i> ). <i>URA3</i> in the resulting plasmid was then replaced with <i>SAT1</i> by <i>MluI-NotI</i> digestion. The plasmid was linearized by <i>NsiI</i> within <i>SAC7c</i> for integration.                                                                                                                                                                                                                                                 |
| pYSL82  | Pro-Myc-RHO1 <sup>G18V</sup> -UTR*/CIP10U; pYGS1315 was used as the template for site-directed mutagenesis to introduce G18V mutation on RHO1. The plasmid was linearized by <i>StuI</i> within the <i>RHO1</i> promoter region for integration.                                                                                                                                                                                                                                                                                                                                                                                                                                                                      |
| pYSL84  | Pro-Myc-RHO1 <sup>D124A</sup> -UTR*/CIP10U; pYGS1315 was used as the template for site-directed mutagenesis to introduce D124A mutation on RHO1. The plasmid was linearized by <i>StuI</i> within the <i>RHO1</i> promoter region for integration.                                                                                                                                                                                                                                                                                                                                                                                                                                                                    |
| pYSL93  | TetO-Myc-MKK2-UTR*-TetR/CIP10U; <i>MKK2</i> coding region was PCR-amplified and cloned into pYGS1244 at <i>Clal-PacI</i> to replace <i>RHO1</i> . The plasmid was linearized by <i>AscI</i> within <i>UTR*</i> for integration to express <i>MKK2</i> .                                                                                                                                                                                                                                                                                                                                                                                                                                                               |
| pYSL153 | TetO-Myc-SAC7-UTR*-TetR/CIP10U; the <i>SAC7</i> coding region (1 to 1848 bp) was PCR-amplified and cloned into pYSL06 at <i>Clal-BstEII</i> to replace an N-terminal fragment of <i>WOR1n</i> and fuse in frame with the 6xMyc epitope. <i>UTR*</i> was then PCR-amplified and cloned at <i>BstEII-PstI</i> to replace the remaining region of <i>WOR1n</i> . The plasmid was linearized by <i>AscI</i> within <i>UTR*</i> for integration to overexpress <i>SAC7</i> in the absence of doxycycline.                                                                                                                                                                                                                  |

- 
1. Murad, A.M., Lee, P.R., Broadbent, I.D., Barelle, C.J., and Brown, A.J. Clp10, an efficient and convenient integrating vector for *Candida albicans*. *Yeast* 16: 325-327 (2000).
  2. Morschhauser, J., Michel, S. & Staib, P. Sequential gene disruption in *Candida albicans* by FLP-mediated site-specific recombination. *Mol Microbiol* 32: 547-556 (1999).
  3. Gratacap, R.L., Rawls, J.F., Wheeler, R.T. Mucosal candidiasis elicits NF-κB activation, proinflammatory gene expression and localized neutrophilia in zebrafish. *Dis Model Mech* 6:1260-70 (2013).
  4. Shen, J., Cowen, L.E., Griffin, A.M., Chan, L., Köhler, J.R. The *Candida albicans* pescadillo homolog is required for normal hypha-to-yeast morphogenesis and yeast proliferation. *Proc Natl Acad Sci USA* 105: 20918-23 (2008). Park, Y.N.,
  5. Morschhauser, J. Tetracycline-Inducible Gene Expression and Gene Deletion in *Candida albicans*. *Eukaryot Cell* 4:1328-1342 (2005).
